# Supplementary material for: Plasma Levels of snoRNAs are Associated with Platelet Activation in Patients with Peripheral Artery Disease
Source: PubMed Central journal article supplement (PMC6929168; doi:10.3390/ijms20235975), 2019-11-27

*Supplemental Data*

**Plasma levels of snoRNAs are associated with platelet activation in patients with peripheral artery disease**

Anne Yař Nossent, Neda Ektefaie, Johann Wojta, Beate Eichelberger, Christoph Kopp, Simon Panzer, Thomas Gremmel

Curve estimations for SNORD113.2 and SNORD114.1 expression in plasma of 104 consecutive PAD patients with parameters of platelet function.

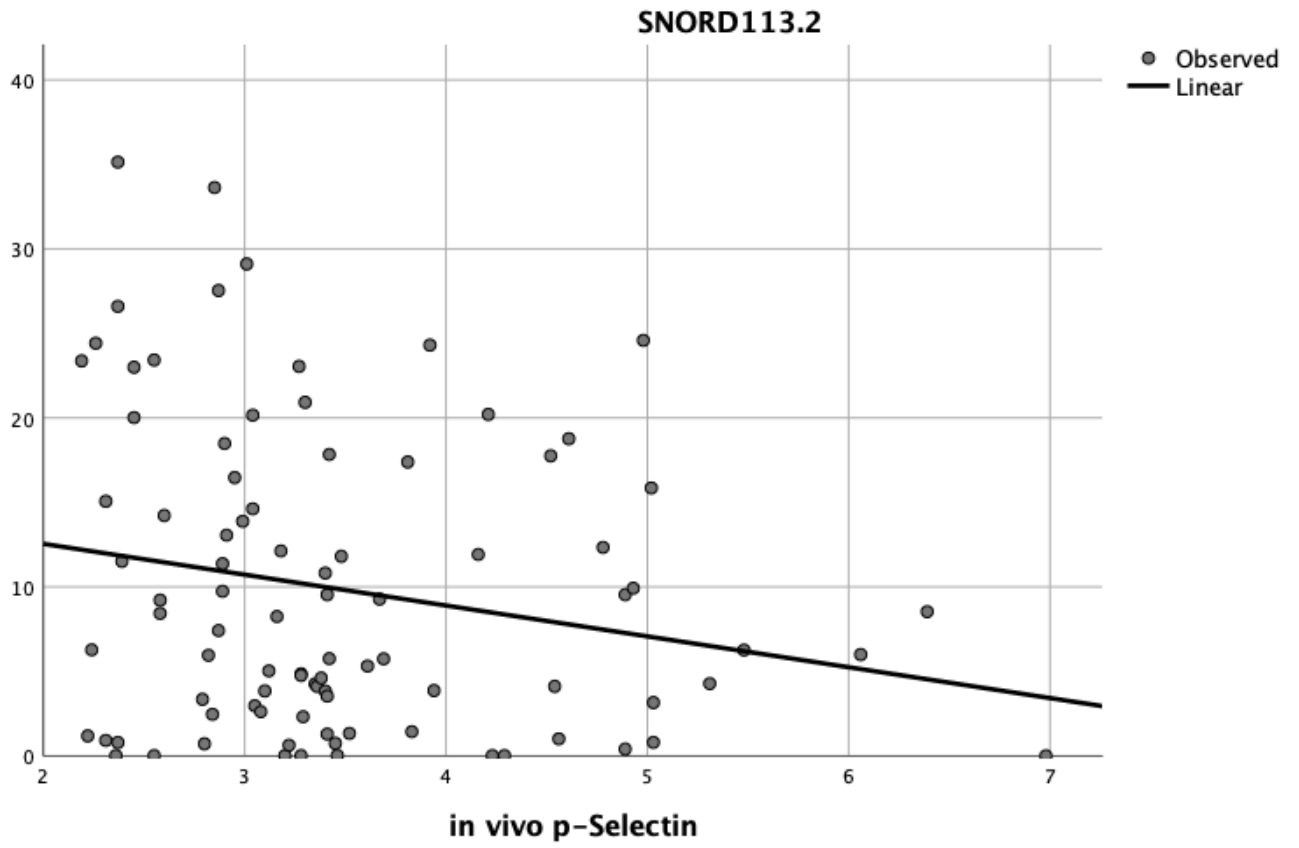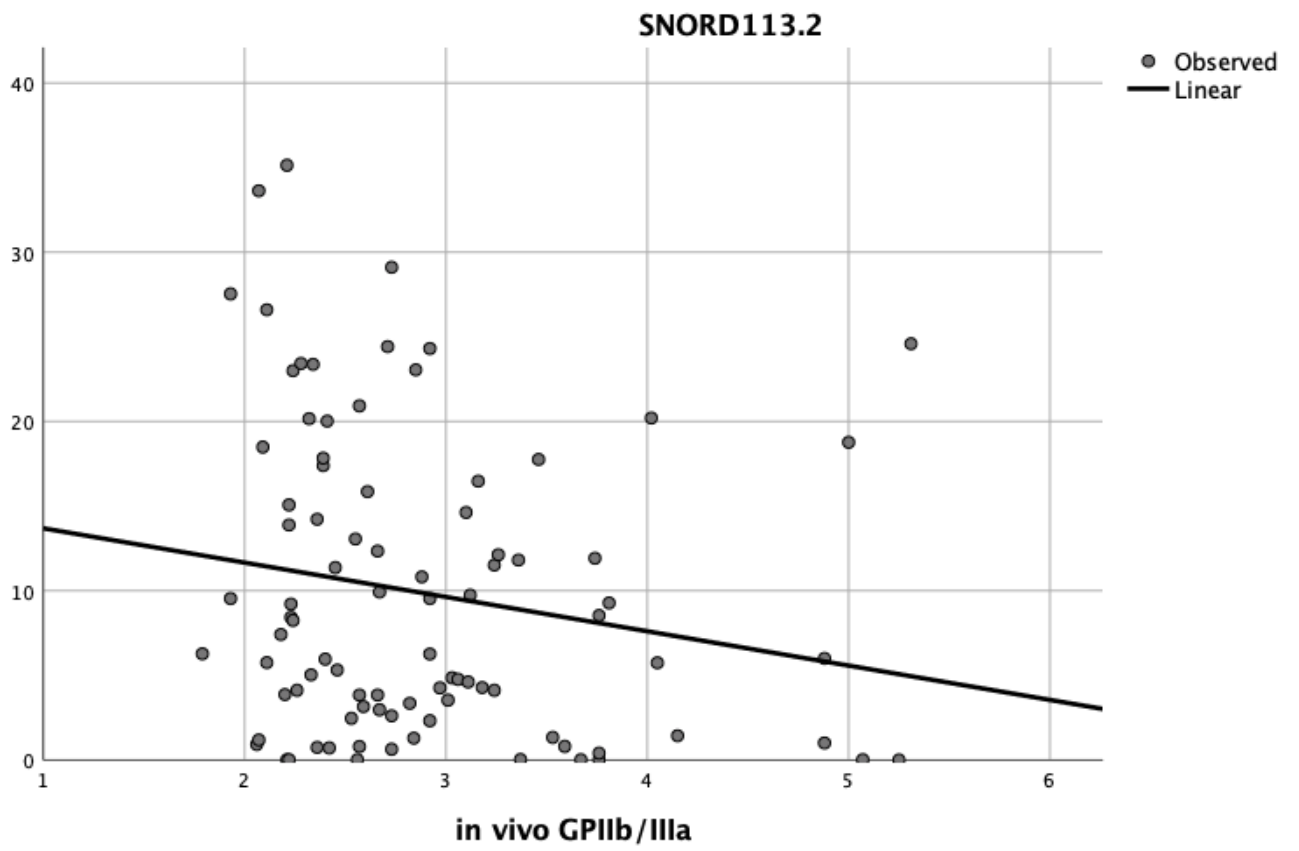

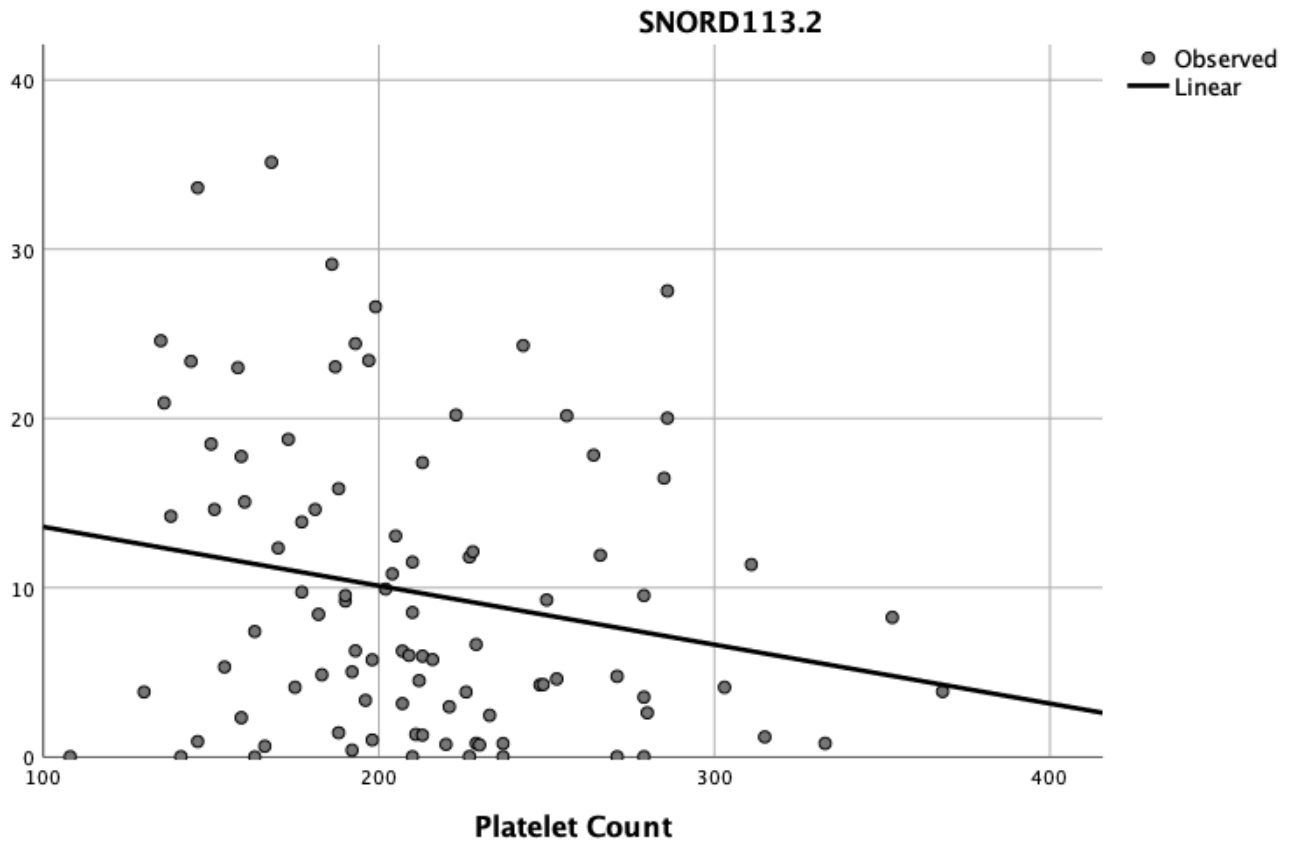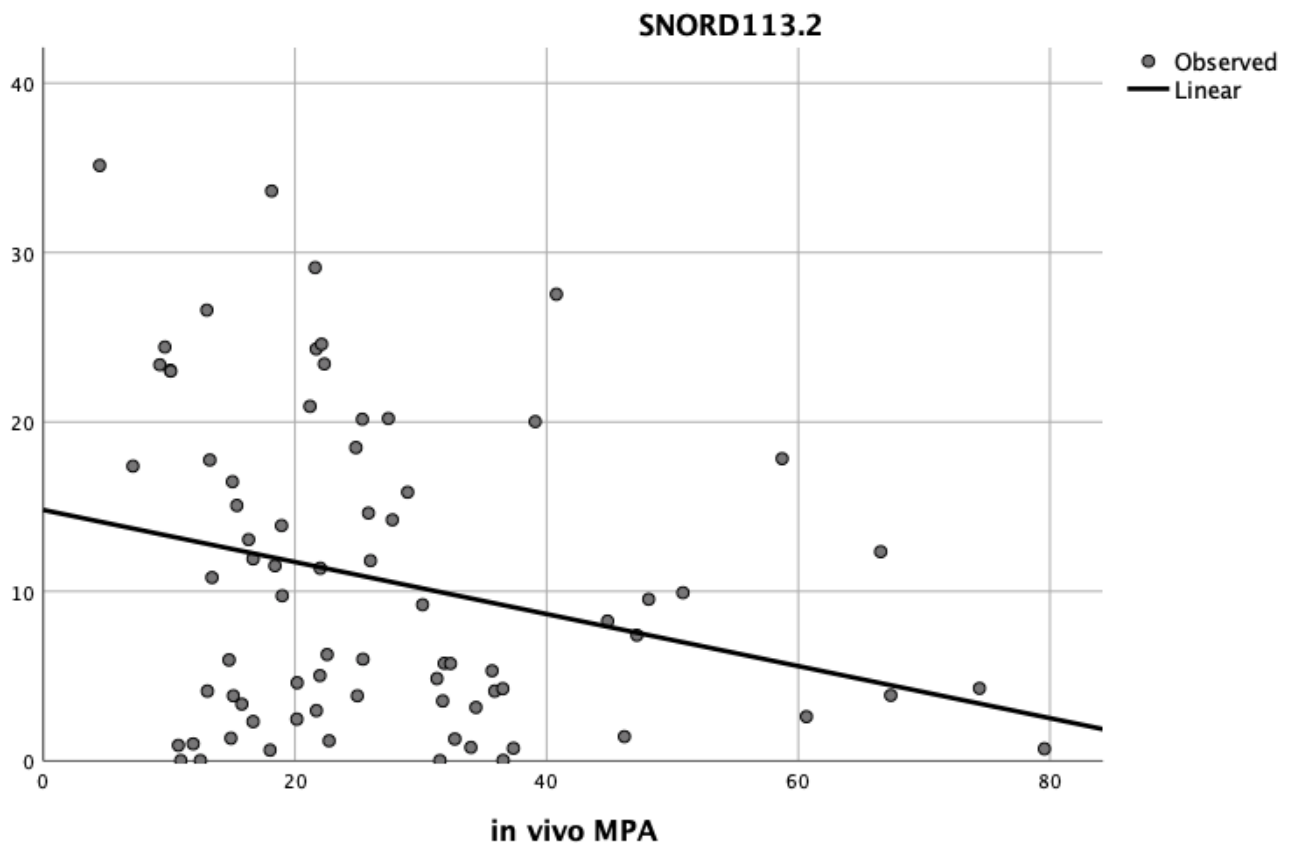

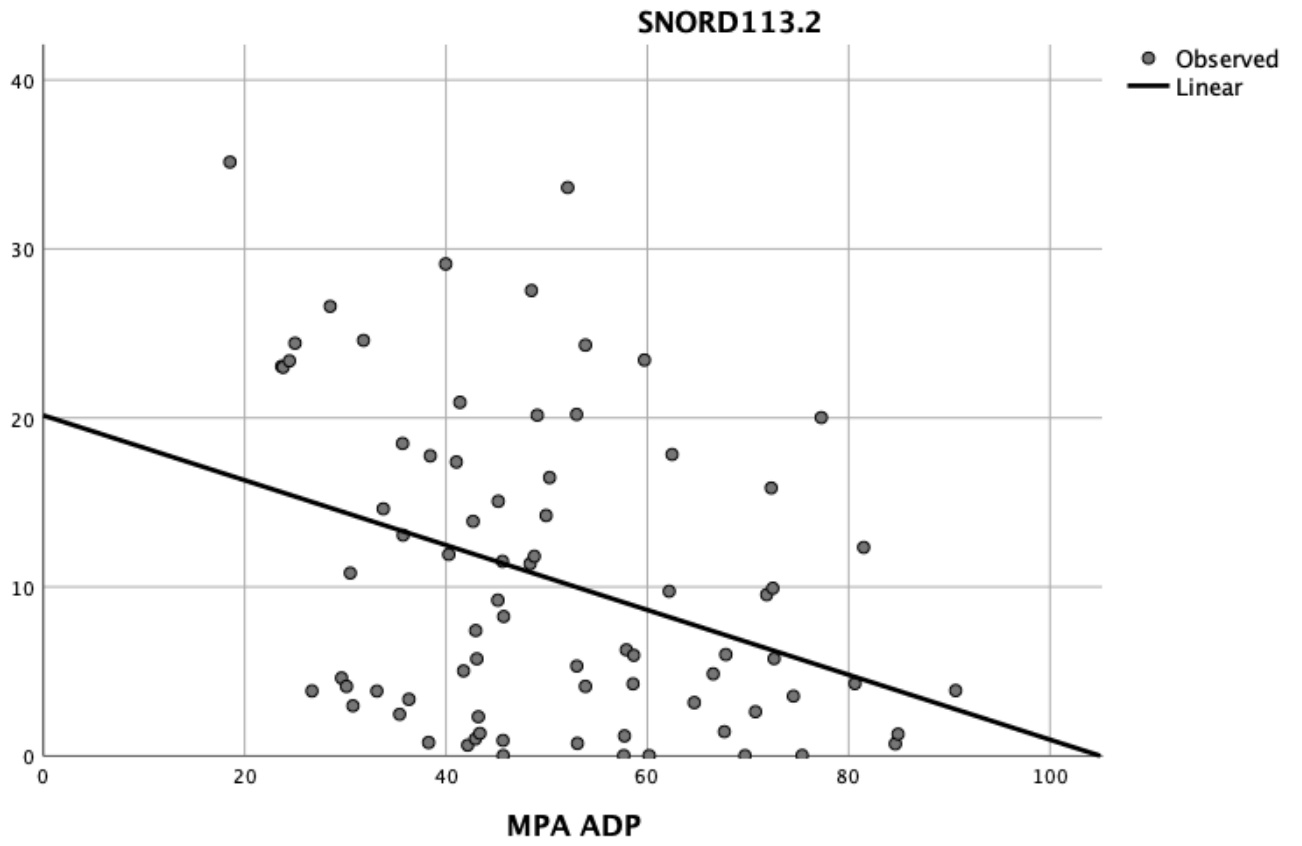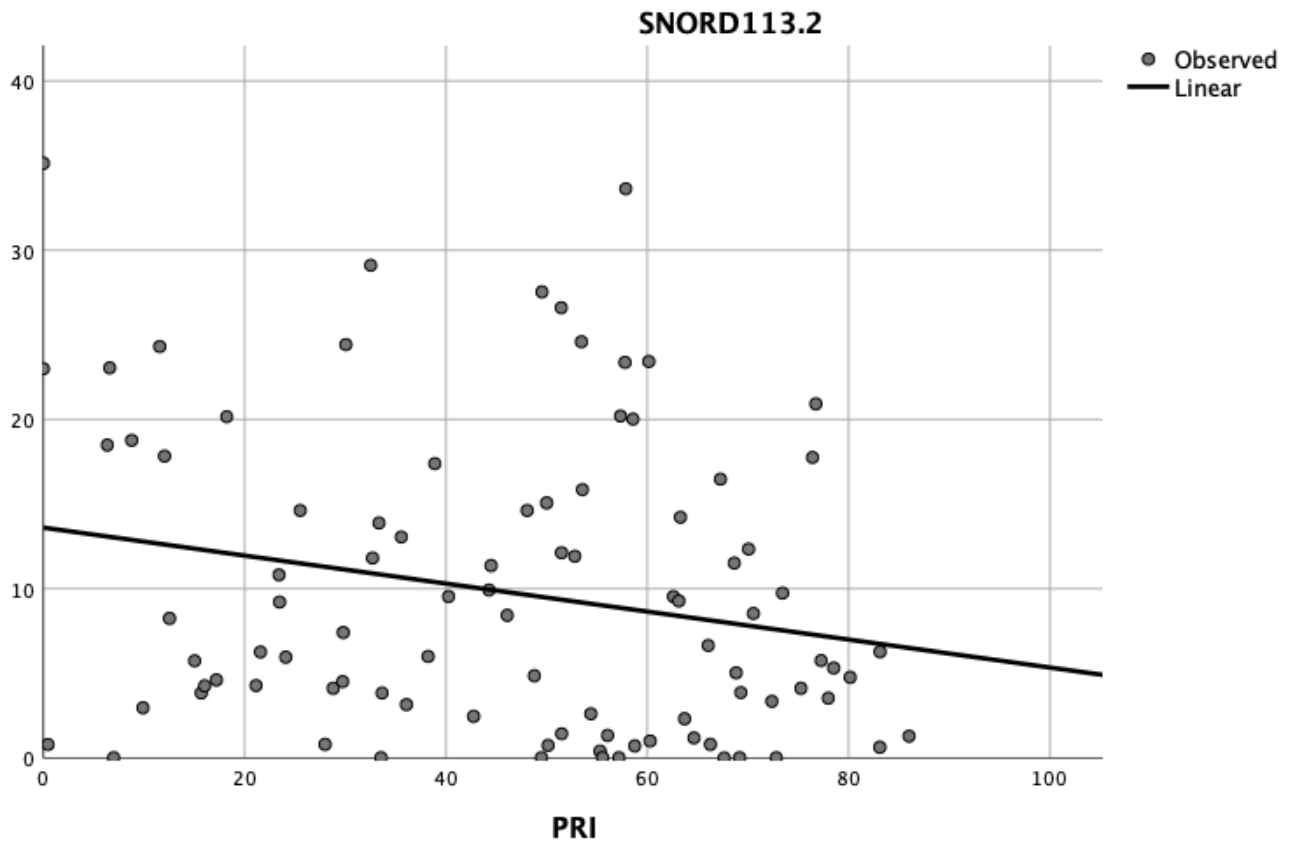

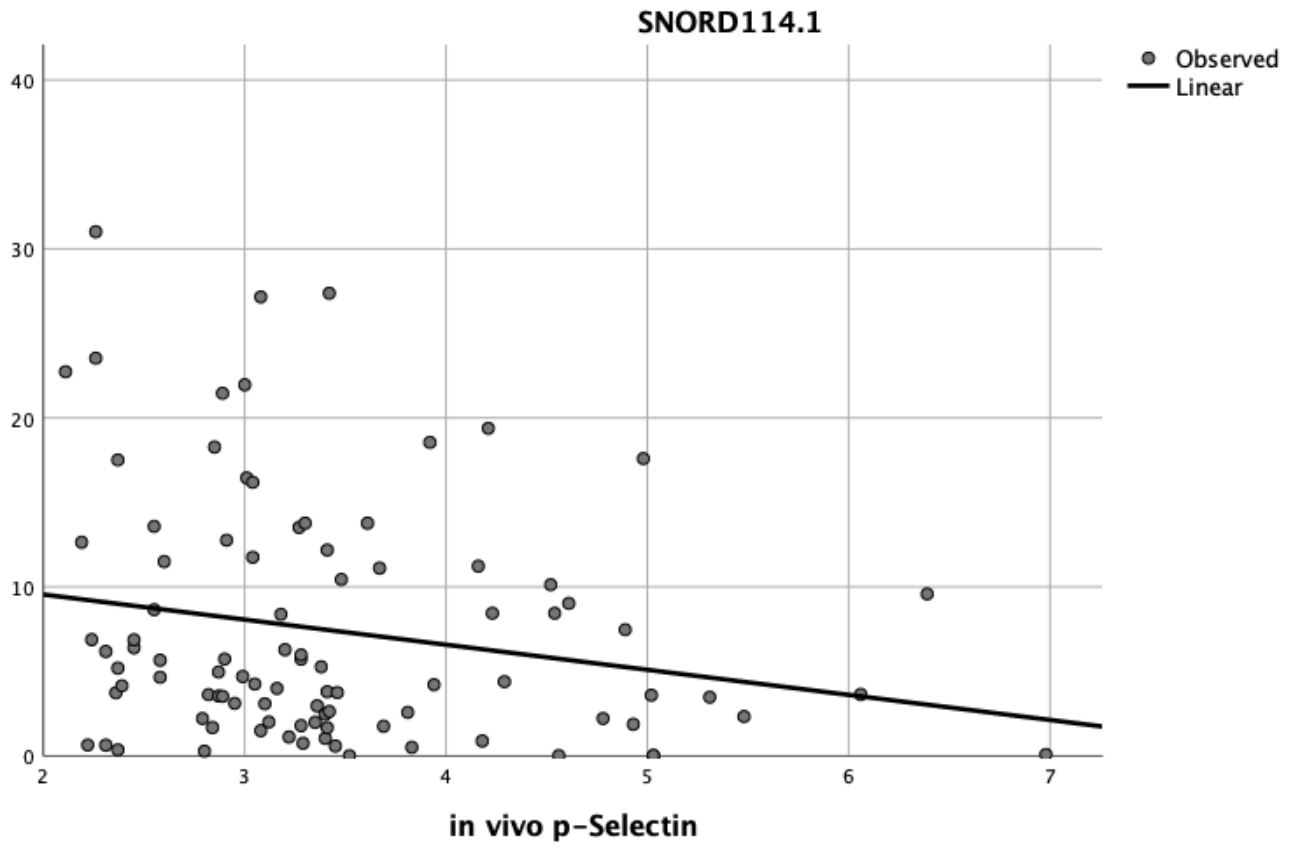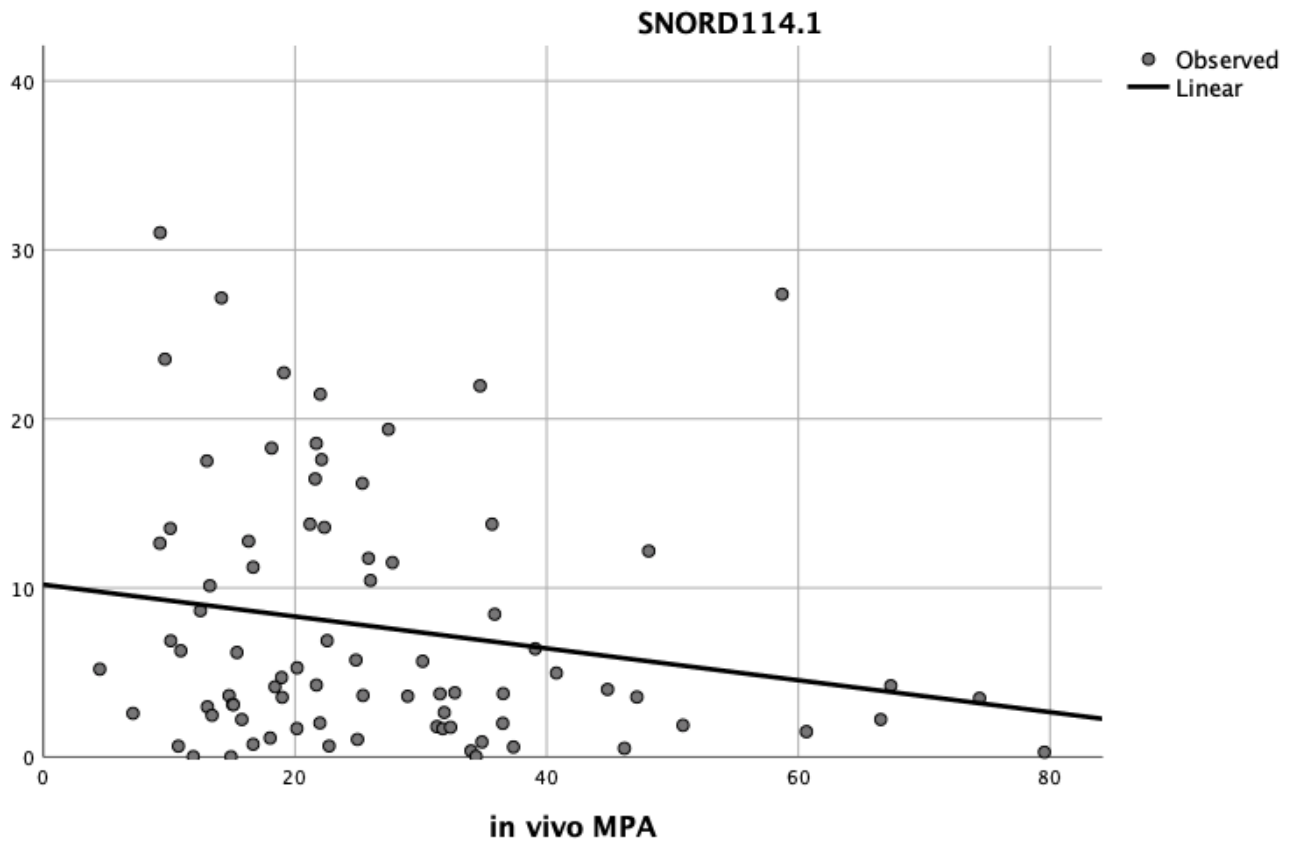

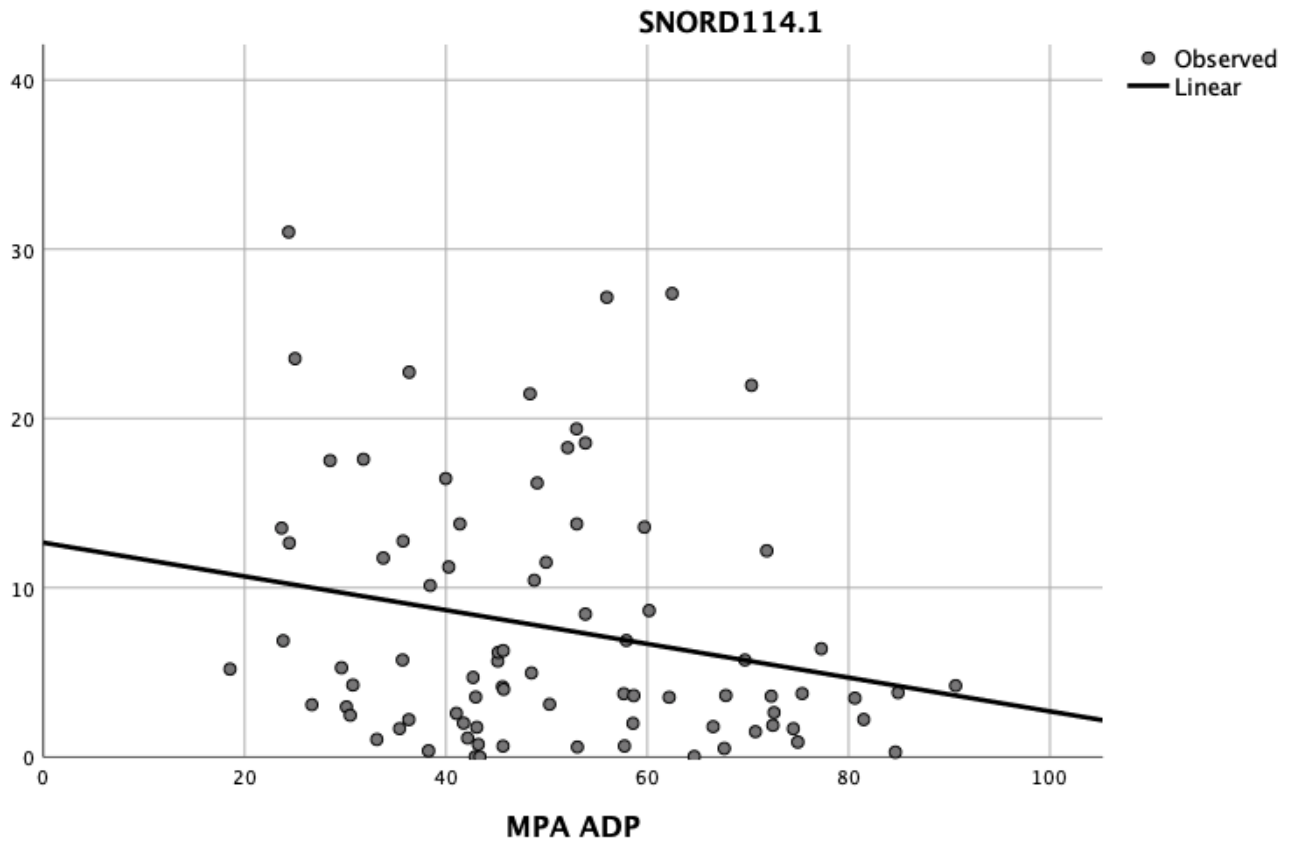

Supplement: ijms-20-05975-s001.pdf [file ijms-20-05975-s001.pdf]
